# Supplementary material for: High-temperature X-ray diffraction and thermal expansion of nanocrystalline and coarse-crystalline acanthite α-Ag2S and argentite β-Ag2S
Source: Royal Society of Chemistry journal article supplement (doi:10.1039/c5cp07224g), 2016-01-01
Supplement: c5cp07224g1.pdf [file c5cp07224g1.pdf]

*Physical Chemistry Chemical Physics*

**Electronic Supplementary Information**

**High-Temperature X-ray Diffraction and Thermal Expansion of Nanocrystalline and Coarse-Crystalline Acanthite  $\alpha$ -Ag<sub>2</sub>S and Argentite  $\beta$ -Ag<sub>2</sub>S**

**S. I. Sadovnikov,<sup>a</sup> A. I. Gusev,<sup>\*a</sup> A. V. Chukin<sup>b</sup> and A. A. Rempel<sup>a</sup>**

<sup>a</sup> *Institute of Solid State Chemistry, Ural Branch of the Russian Academy of Sciences, Pervomaiskaya 91, Ekaterinburg 620990, Russia.*

<sup>b</sup> *Ural Federal University named after the First President of Russia B.N. Yeltsin, Mira 19, Ekaterinburg, 620002, Russia.*

E-mail: gusev@ihim.uran.ru

## Experimental details

Nanocrystalline powders of silver sulfide  $\text{Ag}_2\text{S}$  have been synthesized by chemical bath deposition from aqueous solution of silver nitrate  $\text{AgNO}_3$  and sodium sulfide  $\text{Na}_2\text{S}$  with addition of a complexing agent. Sodium citrate  $\text{Na}_3\text{C}_6\text{H}_5\text{O}_7 \equiv \text{Na}_3\text{Cit}$  was used as a complexing agent and electrostatic stabilizer. The initial solutions of  $\text{AgNO}_3$ ,  $\text{Na}_2\text{S}$ , and  $\text{Na}_3\text{Cit}$  had equal concentrations,  $500 \text{ mmol l}^{-1}$ .

Synthesis was carried out in the following sequence. Complexing agent was added to 20 ml initial solution of silver nitrate while constant stirring. The volume of an added initial solution of sodium citrate  $\text{Na}_3\text{Cit}$  was varied from 2 to 40 ml. Then the distilled water was added and mixture volume was brought up to 190 ml. Resulting solution was mixed with 10 ml initial solution of  $\text{Na}_2\text{S}$ .

Deposition of silver sulfide occurred by the following reaction scheme

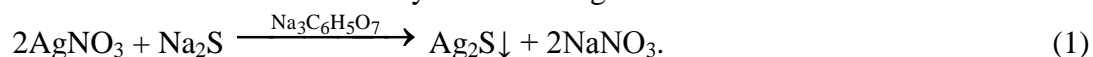

The concentrations of  $\text{AgNO}_3$ ,  $\text{Na}_2\text{S}$  and  $\text{Na}_3\text{Cit}$  in all the reaction mixtures for the preparation of silver sulfide nanopowders were 50, 25 and  $12.5 \text{ mmol l}^{-1}$ , respectively.

When the solutions of reagents are mixed, silver sulfide is formed almost instantly; as a result, the reaction mixture first turns black, and then deposition of  $\text{Ag}_2\text{S}$  particles begins. The largest particles deposit during 1 h, the average-size (50-80 nm) particles agglomerate and also deposit. The deposition ends in one day, and the solution becomes transparent.

The upper part of colloid solution was decanted.  $\text{Ag}_2\text{S}$  powders deposited which remained after the decanting were washed with distilled water and dried in air at 323 K.

The coarse-crystalline  $\text{Ag}_2\text{S}$  powder was produced by hydrothermal synthesis from aqueous solutions of  $\text{AgNO}_3$  and thiourea  $(\text{NH}_2)_2\text{CS}$  with equal concentrations  $50 \text{ mmol}\cdot\text{l}^{-1}$ . Thiourea  $(\text{NH}_2)_2\text{CS}$  was used as a source of sulfur. The sulfide formation reaction took place in a closed vessel at 453 K for 4 h. The air and saturated vapor pressure over the solution was  $\sim 1 \cdot 10^6 \text{ Pa}$ .

*In situ* high-temperature XRD (HT-XRD) experiments were performed using an X'Pert PRO MPD (Panalytical) diffractometer equipped with a Anton Paar HTK-1200 Oven furnace. HT-HRD patterns were recorded in the angle interval  $2\theta = 20\text{--}67.5^\circ$  with a step of  $\Delta(2\theta) = 0.026^\circ$  and scanning time 200 s in each point. X'Pert PRO MPD diffractometer was equipped with a position-sensitive fast sector detector PIXCEL, which simultaneously measures the intensity of reflection not at a separate point as an ordinary proportional counter, but in a  $2\theta$  range with a width of  $3.154^\circ$ . The use of this detector allowed one to reduce considerably the XRD pattern survey time with no compromise in quality. The diffraction measurements were performed at a temperature from 295 to 623 K with a step of  $\sim 25\text{--}30 \text{ K}$ . When the assigned heating temperature was reached, the XRD pattern was recorded during 30 min.

All the deposited powders were examined by XRD method on a Shimadzu XRD-7000 and STADI-P (STOE) diffractometers in  $\text{CuK}\alpha_1$  radiation. The XRD measurements were performed in the angle interval  $2\theta = 20\text{--}95^\circ$  with a step of  $\Delta(2\theta) = 0.02^\circ$  and scanning time of 10 sec in each point. The determination of the crystal lattice parameters and final refinement of the structure of synthesized silver sulfide powders were carried out with the use of the X'Pert Plus program package.<sup>1</sup> XRD pattern of monoclinic (space group  $P2_1/c$ ) silver sulfide contains more than 100 diffraction reflections with different intensity in the range of  $2\theta$  angles from  $20^\circ$  to  $95^\circ$ .<sup>2</sup>

The average particle size  $D$  (to be more precise, the average size of coherent scattering regions (CSR)) in deposited silver sulfide powders was estimated by XRD method from the diffraction reflection broadening using the dependence of reduced reflection broadening  $\beta^*(2\theta) = [\beta(2\theta)\cos\theta]/\lambda$  on the scattering vector  $s = (2\sin\theta)/\lambda$ .<sup>3,4</sup> According to,<sup>3</sup> the broadening of diffraction reflections is observed if particle size less than 100 nm. The value of broadening  $\beta(2\theta)$  was determined by comparing the experimental width of each diffraction reflection,  $\text{FWHM}_{\text{exp}}$ , with the instrumental resolution function  $\text{FWHM}_R$  of the X-ray diffractometer as  $\beta(2\theta) = [(\text{FWHM}_{\text{exp}})^2 - (\text{FWHM}_R)^2]^{1/2}$ . The resolution function  $\text{FWHM}_R(2\theta) = (u\tan^2\theta + v\tan\theta + w)^{1/2}$  of the Shimadzu XRD-7000 diffractometer was determined in a special diffraction experiment using the cubic lan-

thorium hexaboride  $\text{LaB}_6$  (NIST Standard Reference Powder 660a) with lattice spacing  $a = 0.41569162$  nm. The parameters of this resolution function  $\text{FWHM}_R(2\theta)$  are  $u = 0.00616$ ,  $v = -0.00457$ , and  $w = 0.00778$ .

All the samples synthesized were characterized by XPS and UV-vis spectroscopy also.

The temperature and enthalpy of the acanthite – argentite phase transformation were determined by DTA-TGA method on a Setaram SETSYS Evolution 1750 thermal analyzer both during heating and during cooling. DTA and TGA experiments were carried out in argon Ar flow of  $20 \text{ ml min}^{-1}$  in the temperature range 293–493 K with a heating rate of  $5 \text{ K} \cdot \text{min}^{-1}$  and during cooling from 493 K to 333 K with a cooling rate of  $5 \text{ K} \cdot \text{min}^{-1}$ .

$\text{Ag}_2\text{S}$  nanopowders were studied using Raman scattering on Centaur UHR complex (NanoScanTechnology). As an example, the Raman spectrum of  $\alpha\text{-Ag}_2\text{S}$  is shown in Fig. 3. Since the  $\alpha\text{-Ag}_2\text{S}$  molecule is triatomic and non-linear, the bands are related to the symmetric stretching mode. The Raman spectrum of  $\alpha\text{-Ag}_2\text{S}$  is characterized by intensive bands in the range of 90–300  $\text{cm}^{-1}$ , in particular at 93, 188 and 243  $\text{cm}^{-1}$  with a shoulder at 273  $\text{cm}^{-1}$ .<sup>5,6</sup> Apart from the bands related to silver lattice vibrations (i.e. phonons) at 93 and 147  $\text{cm}^{-1}$ , the others can be assigned to Ag-S-Ag symmetric stretching mode. A dominant sharp peak at  $\sim 430 \text{ cm}^{-1}$  corresponds to low-temperature monoclinic  $\alpha\text{-Ag}_2\text{S}$  phase.<sup>7</sup> Weak overtone and strong fundamental modes are detected at  $\sim 215 \text{ cm}^{-1}$  and  $\sim 430 \text{ cm}^{-1}$  correspond to the first-order and second-order longitudinal optical phonon modes in  $\text{Ag}_2\text{S}$  respectively and are the result of phonon vibration. Broadening of the peaks in the Raman spectrum indicate the formation of nanoparticles.

The microstructure and particle size of the silver sulfide powders and their elemental chemical composition was studied by the scanning electron microscopy (SEM) method on a JEOL JSM 6390 LA microscope coupled with a JED 2300 Energy Dispersive X-ray Analyzer. In addition, nanocrystalline silver sulfide was examined by transmission electron microscopy (TEM) method. The HRTEM images were recorded on a JEOL JEM-2010 transmission electron microscope with 140 pm (1.4 Å) lattice resolution. The elemental chemical composition of  $\text{Ag}_2\text{S}$  nanoparticles was studied on the same microscope with the use of an Phoenix (EDAX) Energy Dispersive Spectrometer with a Si(Li) detector having energy resolution of 130 eV. A copper grid with an aperture diameter of 50  $\mu\text{m}$  was used for SEM and TEM observing of  $\text{Ag}_2\text{S}$  particles. One or two layers of collodium-glue (alcoholic solution of kolloksilin) were applied to Cu grid. After the drying of the glue coating, a carbon substrate with voids is formed. The  $\text{Ag}_2\text{S}$  powders to be examined were deposited on a carbon substrate. For studying  $\text{Ag}_2\text{S}$  nanoparticles we used such regions where the nanoparticles are located in the carbon substrate voids.

The average particle size  $D$  was estimated from the value of specific surface area  $S_{\text{sp}}$  also. The specific surface area  $S_{\text{sp}}$  of the synthesized silver sulfide powders was found by the Brunauer-Emmett-Teller (BET) method from the isotherms of low-temperature adsorption of molecular nitrogen vapors at 77 K. The measurements were carried out by means of a Gemini VII 2390t Surface Area Analyzer. In the approximation that all particles have similar size and spherical shape, the average particle size  $D$  is equal to  $6/\rho S_{\text{sp}}$  ( $\rho = 7.25 \text{ g} \cdot \text{cm}^{-3}$  is the density of silver sulfide).

## References

- 1 X'Pert Plus Version 1.0. Program for Crystallography and Rietveld analysis Philips Analytical B. V. © 1999 Koninklijke Philips Electronics N. V.
- 2 S. I. Sadovnikov, A. I. Gusev and A. A. Rempel, *Superlatt. Microstr.* 2015, **83**, 35–47.
- 3 A. I. Gusev and A. A. Rempel, *Nanocrystalline Materials*, Cambridge Intern. Sci. Publ., Cambridge, 2004, pp.159–226.
- 4 S. I. Sadovnikov and A. I. Gusev, *J. Alloys Comp.*, 2014, **586**, 105–112.
- 5 G. Socrates, *Infrared and Raman Characteristic Group Frequencies: Tables and Charts*. 3<sup>rd</sup> ed. Wiley, 2001.
- 6 J. I. Lee, S. M. Howard, J. J. Kellar, K. N. Han and W. Cross, *Metall. Mater. Trans. B*, 2001, **32**, 895–901.
- 7 K. Terabe, T. Hasegawa, C. H. Liang and M. Aono, *Sci. Tech. Adv. Mater.*, 2005, **8**, 536–542.

## SI Figures

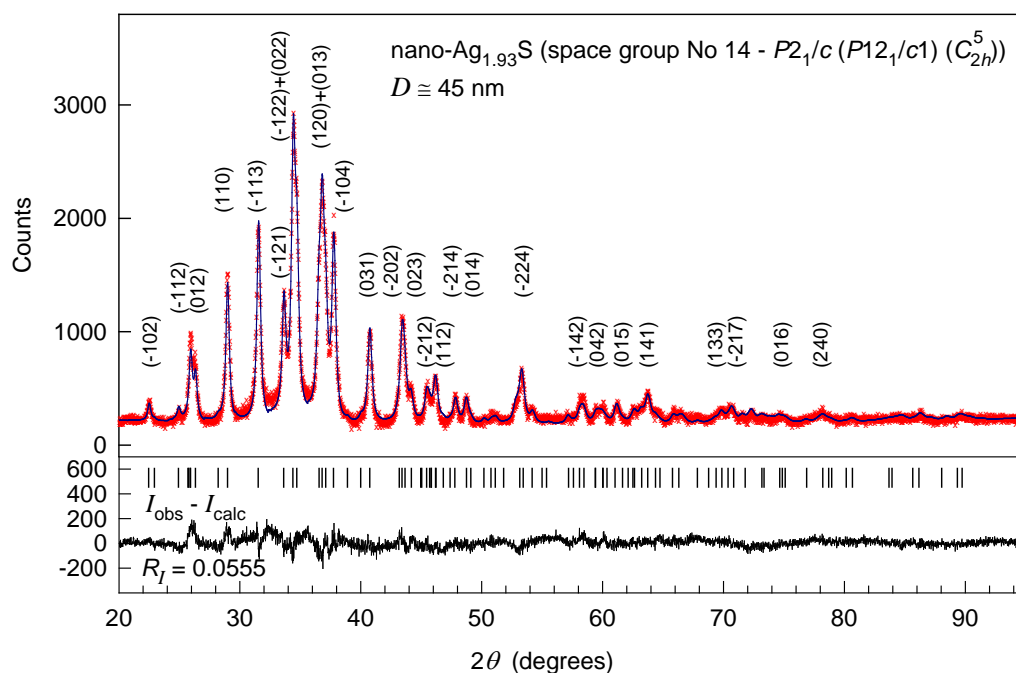

**Figure S1.** The experimental (×) and calculated (—) XRD patterns of deposited monoclinic  $\text{Ag}_{1.93}\text{S}$  nanopowder at a temperature of 295 K. The difference between the experimental and calculated XRD patterns ( $I_{\text{obs}} - I_{\text{calc}}$ ) is shown in the lower part of the Figure. The XRD pattern is recorded in  $\text{CuK}\alpha_1$  radiation.

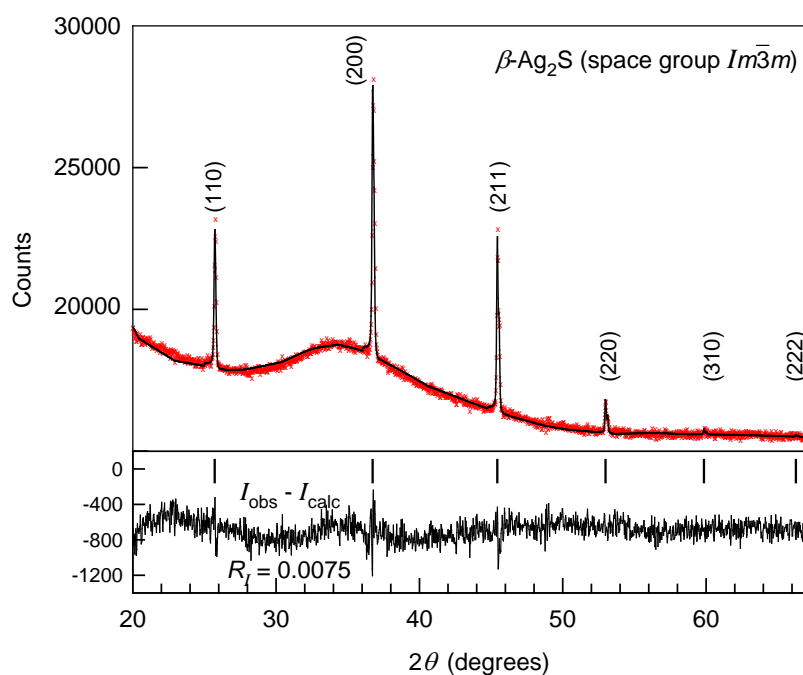

**Figure S2.** The experimental (×) and calculated (—) XRD patterns of bcc argentite  $\text{Ag}_2\text{S}$  at a temperature of 503 K. The difference between the experimental and calculated XRD patterns ( $I_{\text{obs}} - I_{\text{calc}}$ ) is shown in the lower part of the Figure. The XRD pattern is recorded in  $\text{CuK}\alpha_1$  radiation.

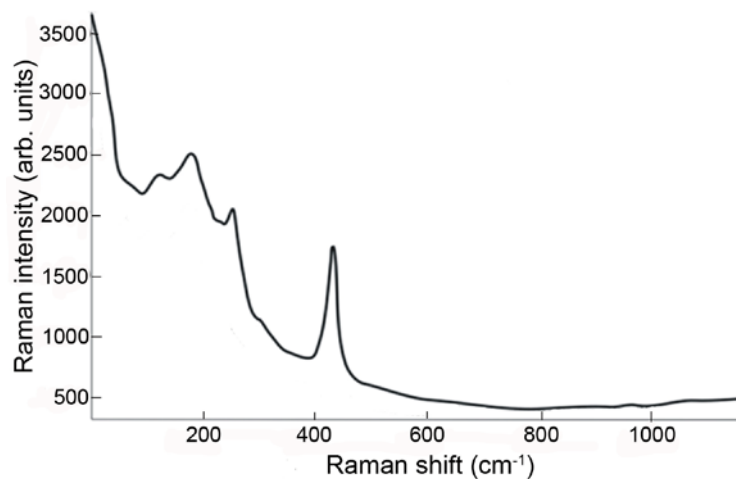

**Figure S3.** Raman spectrum of Ag<sub>2</sub>S nanopowder.

## SI Tables

**Table S1.** Refined crystal structure of coarse-crystalline monoclinic (space group No 14 -  $P2_1/c$  ( $P12_1/c1$ ) ( $C_{2h}^5$ )) silver sulfide Ag<sub>2</sub>S with  $\alpha$ -Ag<sub>2</sub>S acanthite type structure at a temperature of 300 K:

$Z = 4$ ,  $a = 0.42264(2)$  nm,  $b = 0.69282(3)$  nm,  $c = 0.95317(3)$  nm, and  $\beta = 125.554(2)^\circ$

| Atom | Position and multiplicity | Occupancy | Atomic coordinates |           |           | $B_{\text{iso}} \times 10^{-4} (\text{pm}^2)$ |
|------|---------------------------|-----------|--------------------|-----------|-----------|-----------------------------------------------|
|      |                           |           | $x$                | $y$       | $z$       |                                               |
| Ag 1 | 4(e)                      | 1.00      | 0.0715(7)          | 0.0151(3) | 0.3094(3) | 5.59(3)                                       |
| Ag 2 | 4(e)                      | 1.00      | 0.7264(7)          | 0.3241(4) | 0.4375(3) | 5.25(3)                                       |
| S    | 4(e)                      | 1.00      | 0.492(2)           | 0.234(1)  | 0.1321(7) | 1.6800                                        |

**Table S2.** Refined crystal structure of monoclinic (space group No 14 -  $P2_1/c$  ( $P12_1/c1$ ))  $\text{Ag}_{1.93}\text{S}$  nanopowder at a temperature of 295 K:  $\alpha$ - $\text{Ag}_2\text{S}$  acanthite-type structure,  $Z = 4$ ,  $a = 423.4(3)$  pm,  $b = 694.9(3)$  pm,  $c = 954.9(5)$  pm, and  $\beta = 125.43(6)^\circ$

| Atom | Position and multiplicity | Atomic coordinates |           |           | Occupancy | $B_{\text{iso}} \times 10^{-4} \text{ (pm}^2\text{)}$ |
|------|---------------------------|--------------------|-----------|-----------|-----------|-------------------------------------------------------|
|      |                           | $x$                | $y$       | $z$       |           |                                                       |
| Ag1  | 4( $e$ )                  | 0.0715(4)          | 0.0151(0) | 0.3093(9) | 0.97(1)   | 10.05(5)                                              |
| Ag2  | 4( $e$ )                  | 0.7264(3)          | 0.3240(9) | 0.4375(0) | 0.96(4)   | 7.44(6)                                               |
| S    | 4( $e$ )                  | 0.4920(2)          | 0.2339(8) | 0.1321(1) | 1.00(0)   | 1.96(0)                                               |

**Table S3.** Refined crystal structure of body centered cubic (space group No. 229 -  $Im\bar{3}m$  ( $I4m\bar{3}2/m$ ) ( $O_h^9$ ))) silver sulfide with  $\beta$ - $\text{Ag}_2\text{S}$  argentite-type structure at a temperature of 503 K:  $Z = 2$ ,  $a = b = c = 0.4874(1)$  nm

| Atom | Position and multiplicity | Atomic coordinates |           |           | Occupancy | $B_{\text{iso}} \times 10^{-4} \text{ (pm}^2\text{)}$ |
|------|---------------------------|--------------------|-----------|-----------|-----------|-------------------------------------------------------|
|      |                           | $x$                | $y$       | $z$       |           |                                                       |
| Ag1  | 6( $b$ )                  | 0                  | 0.5       | 0.5       | 0.0978(7) | 0.50                                                  |
| Ag2  | 48( $j$ )                 | 0                  | 0.3306(5) | 0.4122(7) | 0.0711(0) | 0.50                                                  |
| S    | 2( $a$ )                  | 0                  | 0         | 0         | 1.00(0)   | 0.50                                                  |
